# Supplementary material for: SARS-CoV-2 Placentitis Associated With B.1.617.2 (Delta) Variant and Fetal Distress or Demise
Source: Oxford University Press journal article supplement (doi:10.1093/infdis/jiac008), 2022-01-11
Supplement: jiac008_suppl_supplementary_table_s1.docx [file jiac008_suppl_supplementary_table_s1.docx]

Supplementary Table 1. Placental pathology and virology findings

|  | Case 1 | Case 2 | Case 3 |
| --- | --- | --- | --- |
| Placental weight (g) | 260g | 286g | 374g |
| Placental weight percentile for gestational age* | <10th | ~10th | <10th |
| Microscopic findings | - SARS-CoV-2 placentitis - Meconium pigment - Plasma cell deciduitis | - SARS-CoV-2 placentitis | - SARS-CoV-2 placentitis - Meconium pigment - Mild acute chorioamnionitis |
| Other gross findings | - Intervillous thrombi | - None | - Intervillous thrombi - Green discolored membranes - Long umbilical cord (84cm) |
| SARS-CoV-2 identified by RNA-ISH in syncytiotrophoblasts | - Yes | - Yes | - Yes |
| SARS-CoV-2 placental viral load (log10 per ng total RNA) | 5.4 (maternal)  6.2 (fetal) | 5.1† | 3.3 (maternal)  3.6 (fetal) |
| SARS-CoV-2 variant identified | B.1.617.2 | B.1.617.2 | B.1.617.2 |

RNA-ISH: RNA *in situ* hybridization. *Reference values for placental weight by gestational age from Pinar et al [46]. †Single placental biopsy taken at delivery institution; maternal vs fetal side not specified.
